# Supplementary material for: Low temperature synthesis and characterization of single phase multi-component fluorite oxide nanoparticle sols
Source: Royal Society of Chemistry journal article supplement (doi:10.1039/c9ra04636d), 2019-01-01
Supplement: c9ra04636d1.pdf [file c9ra04636d1.pdf]

**Supporting information for**

**Low temperature synthesis and characterization of single phase multi-  
component fluorite oxide nanoparticle sols**

Mariappan Anandkumar,<sup>a</sup> Saswata Bhattacharya,<sup>a</sup> and Atul Suresh Deshpande<sup>\*a</sup>

<sup>a</sup>Department of Materials Science and Metallurgical Engineering,

Indian Institute of Technology Hyderabad, Kandi, Sangareddy - 502285, INDIA

\*Corresponding author: email- [atuldeshpande@iith.ac.in](mailto:atuldeshpande@iith.ac.in)

Phone: +91-4023017044

**Table S1.** d spacing values of GLCHZ and GLYHZ calculated from SAED pattern as well as through XRD Rietveld refinement of xrd pattern.

| Sample    | Plane | d spacing<br>(nm) |            |
|-----------|-------|-------------------|------------|
|           |       | SAED<br>pattern   | Refinement |
|           |       |                   |            |
| GLCHZ-RT  | 111   | 0.31              | 0.30       |
|           | 200   | 0.28              | 0.26       |
|           | 220   | 0.19              | 0.18       |
|           | 311   | 0.16              | 0.16       |
| GLCHZ-500 | 111   | 0.31              | 0.30       |
|           | 200   | 0.27              | 0.26       |
|           | 220   | 0.19              | 0.18       |
|           | 311   | 0.16              | 0.16       |
| GLYHZ-RT  | 111   | 0.31              | 0.30       |
|           | 200   | 0.28              | 0.26       |

|           |     |      |      |
|-----------|-----|------|------|
|           | 220 | 0.19 | 0.18 |
|           | 311 | 0.16 | 0.16 |
|           | 111 | 0.30 | 0.30 |
|           | 200 | 0.26 | 0.26 |
| GLYHZ-500 | 220 | 0.18 | 0.18 |
|           | 311 | 0.15 | 0.16 |

---

**Table S2.** Chemical composition of GLCHZ-RT and GLYHZ-RT using SEM-EDS and ICP-OES spectroscopy

| Sample   | Element (at %) |      |       |       |       |       |       |
|----------|----------------|------|-------|-------|-------|-------|-------|
|          | Ce             | Gd   | Hf    | La    | Zr    | Y     |       |
| GLCHZ-RT | SEM-EDS        | 23.2 | 16.3  | 18.2  | 23.7  | 18.5  | -     |
|          | ICP-OES        | 24.3 | 16.98 | 19.24 | 22.04 | 17.44 | -     |
| GLYHZ-RT | SEM-EDS        | -    | 16.3  | 16.3  | 21.3  | 17.4  | 28.7  |
|          | ICP-OES        | -    | 17.97 | 18.21 | 22.01 | 17.46 | 24.35 |

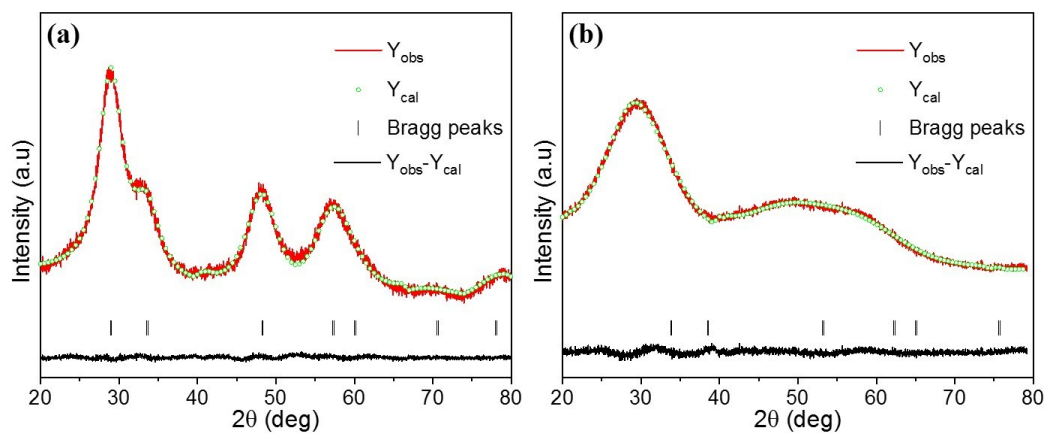

**Fig. S1** Rietveld refinement plots of (a) GLCHZ-RT and (b) GLYHZ-RT nanoparticles.

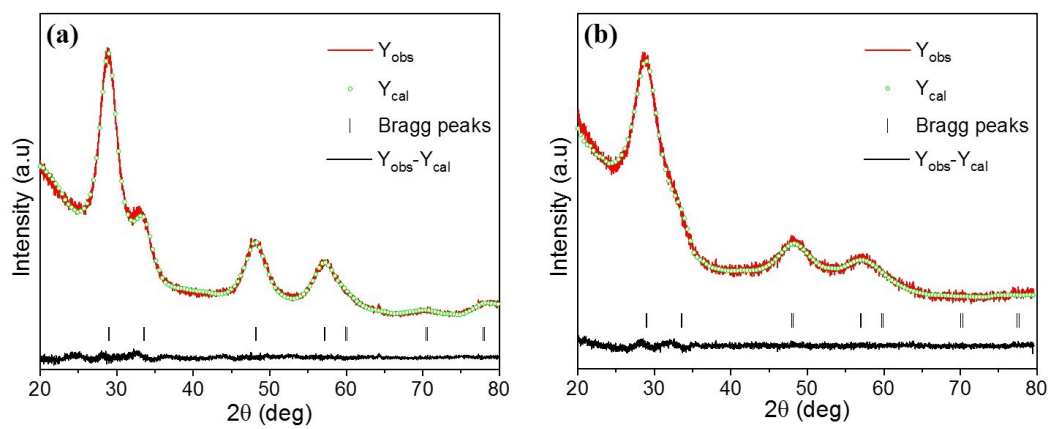

**Fig. S2** Rietveld refinement plots of (a) GLCHZ-500 and (b) GLYHZ-500 nanoparticles.

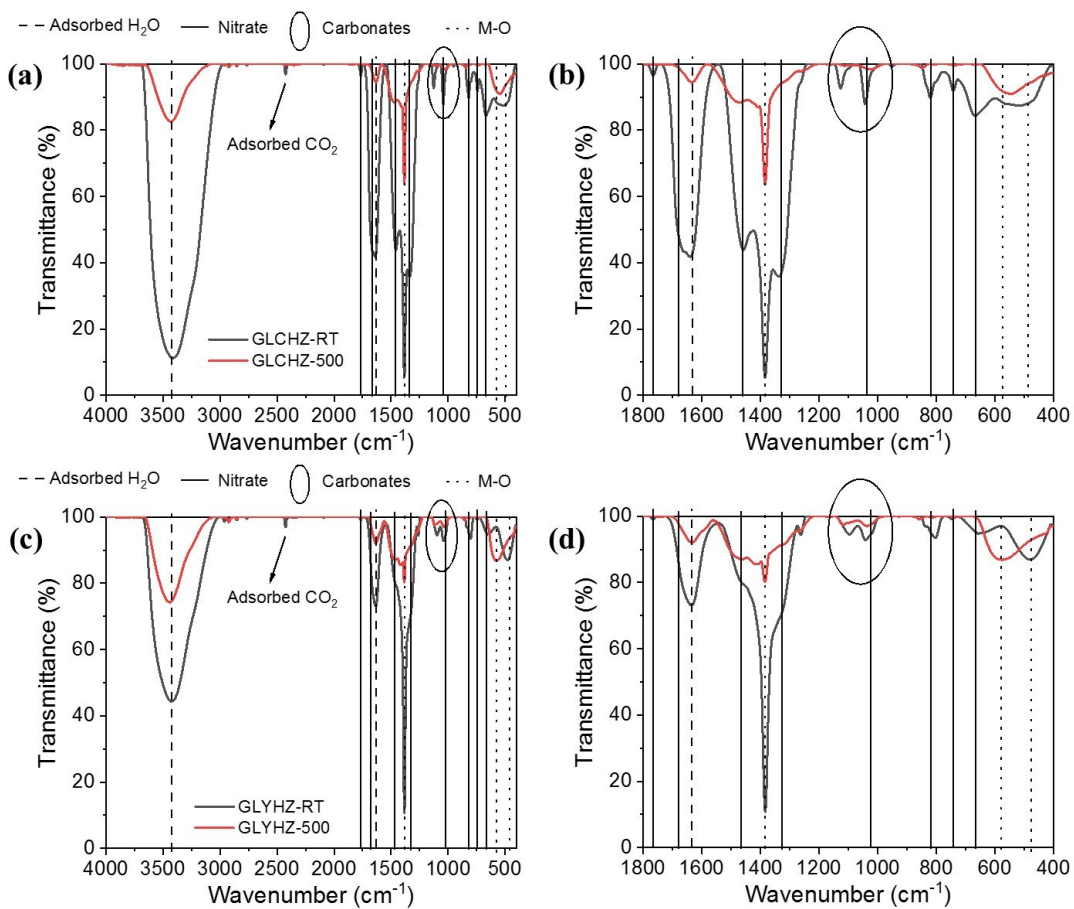

**Fig. S3** FT-IR spectra of as-synthesized and calcined (a) GHCHZ (left) and (b) GLYHZ (right) nanoparticles (c) and (d) enlarged FT-IR spectrum of GLCHZ and GLYHZ respectively.

**Table S3.** Assignment of FTIR peaks with various vibrational modes of as-synthesized and calcined GLYHZ and GLCHZ powders.

| <b>Wavenumber (cm<sup>-1</sup>)</b>               | <b>Mode</b>              | <b>Reference</b> |
|---------------------------------------------------|--------------------------|------------------|
| 2900-3750                                         | Adsorbed water           | 1-3              |
| 1640                                              | H <sub>2</sub> O bending | 1                |
| 1765, 1665, 1461,<br>1337, 1042, 819, 742,<br>668 | Nitrates                 | 1, 4             |
| 2250 – 2400,                                      | Adsorbed CO <sub>2</sub> | 5                |
| 1025 – 1063                                       | Adsorbed carbonates      | 6, 7             |
| 400 - 750                                         | M-O stretching           | 1, 2             |



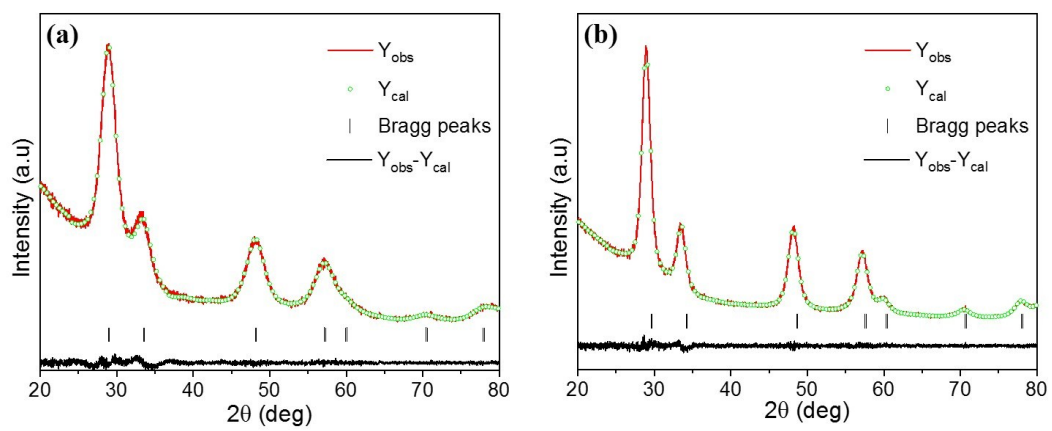

**Fig. S4** Rietveld refinement plots of (a) GLCHZ-750 and (b) GLCHZ-1000 nanoparticles.

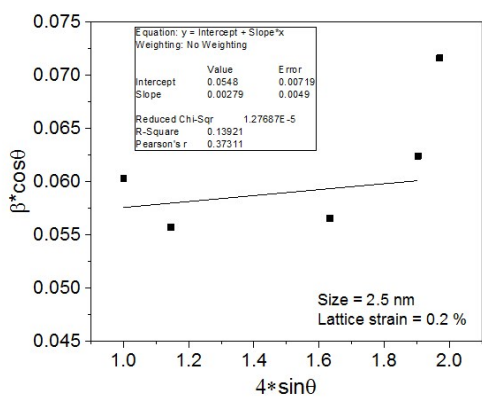

**Fig. S5** Williamson-Hall plot of GLCHZ-RT nanoparticles

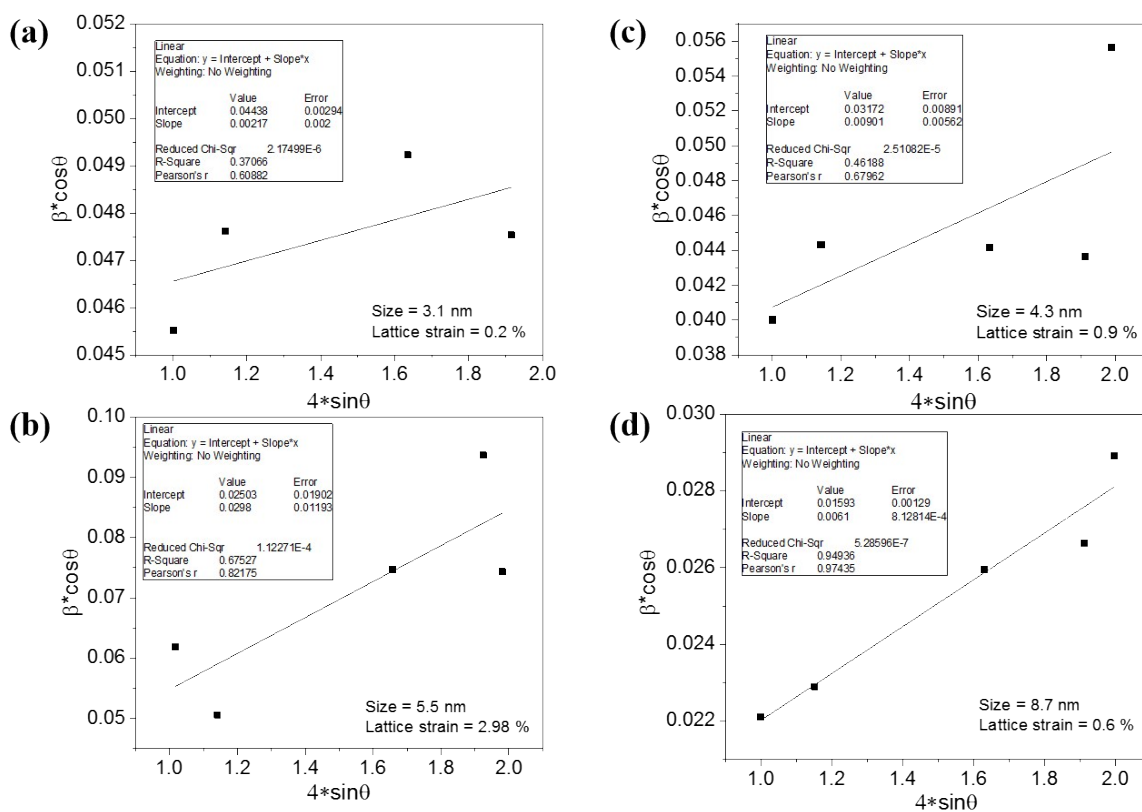

**Fig. S6** Williamson-Hall plots of (a) GLCHZ-500, (b) GLYHZ-500, (c) GLCHZ-750 and (d) GLCHZ-1000 nanoparticles.

**Table S4.** Summary of refined values for different compositions

| <b>Sample</b>     | <b>Size<sup>a</sup><br/>(nm)</b> | <b>microstrain<sup>a</sup><br/>(%)</b> | <b>Lattice parameter<br/>(Å)</b> | <b>R<sub>p</sub><br/>(%)</b> | <b>R<sub>wp</sub><br/>(%)</b> | <b><math>\chi^2</math></b> | <b>Goodness of<br/>Fit</b> |
|-------------------|----------------------------------|----------------------------------------|----------------------------------|------------------------------|-------------------------------|----------------------------|----------------------------|
| <b>GLYHZ-RT</b>   | -                                | -                                      | 5.343 ± 0.001                    | 4.44                         | 5.02                          | 1.36                       | 1.17                       |
| <b>GLYHZ-500</b>  | 5.5                              | 2.98 ± 1.1                             | 5.338 ± 0.002                    | 3.48                         | 4.15                          | 1.62                       | 1.27                       |
| <b>GLCHZ-RT</b>   | 2.5                              | 0.2 ± 0.4                              | 5.340 ± 0.002                    | 9.39                         | 9.66                          | 1.59                       | 1.26                       |
| <b>GLCHZ-500</b>  | 3.1                              | 0.2 ± 0.2                              | 5.346 ± 0.001                    | 7.05                         | 8.07                          | 1.63                       | 1.27                       |
| <b>GLCHZ-750</b>  | 4.3                              | 0.9 ± 0.5                              | 5.347 ± 0.001                    | 7.45                         | 8.34                          | 1.51                       | 1.23                       |
| <b>GLCHZ-1000</b> | 8.7                              | 0.6 ± 0.08                             | 5.343 ± 0.004                    | 7.22                         | 7.37                          | 1.19                       | 1.09                       |

<sup>a</sup> values obtained from Williamson-Hall Plot.

## References

1. J. Seo, J. W. Lee, J. Moon, W. Sigmund and U. Paik, *ACS Applied Materials & Interfaces*, 2014, **6**, 7388-7394.
2. R. A. Rocha and E. N. S. Muccillo, *Materials Research Bulletin*, 2003, **38**, 1979-1986.
3. G. A. M. Hussein, N. Sheppard, M. I. Zaki and R. B. Fahim, *Journal of the Chemical Society, Faraday Transactions*, 1991, **87**, 2661-2668.
4. H. A. Al-Hosney and V. H. Grassian, *Physical Chemistry Chemical Physics*, 2005, **7**, 1266-1276.
5. J. Wang, V. F. Kispersky, W. Nicholas Delgass and F. H. Ribeiro, *Journal of Catalysis*, 2012, **289**, 171-178.
6. M. Daturi, C. Binet, J.-C. Lavalley, A. Galtayries and R. Sporken, *Physical Chemistry Chemical Physics*, 1999, **1**, 5717-5724.
7. M. Li, U. Tumuluri, Z. Wu and S. Dai, *ChemSusChem*, 2015, **8**, 3651-3660.
